# Supplementary material for: Wholly Rickettsia! Reconstructed Metabolic Profile of the Quintessential Bacterial Parasite of Eukaryotic Cells
Source: PubMed Central journal article supplement (PMC5615194; doi:10.1128/mbio.00859-17), 2017-09-26
Supplement: mbo005173495sf1.pdf [file mbo005173495sf1.pdf]

**FIG S1. *Rickettsia* species import six host metabolites that are required for the synthesis of cell envelope glycoconjugates and glycerophospholipids.**

(A) Consensus metazoan pathway for the generation of metabolites (UDP-glucose, *N*-acetyl-alpha-D-glucosamine 1-P (NAG-1-P), D-ribose 5-P, dihydroxyacetone P (DHAP), *sn*-glycerol 3-P (G3P), and pyruvate) that *Rickettsia* species must acquire to initiate biosynthesis of peptidoglycan (PGN), lipopolysaccharide (LPS) and glycerophospholipids. Red ellipses, metabolites previously shown to be imported; yellow ellipses, metabolites predicted to be imported based on metabolic network reconstruction. Gray shading depicts each point of the host metabolic network where *Rickettsia* species acquire metabolites, with blue text describing how rickettsiae utilize these metabolites. For biosynthesis of glycerophospholipids, *Rickettsia* species import G3P, but also can convert G3P from DHAP if *gpsA* (encoding glycerol-3-phosphate dehydrogenase) is present (shown in green) (1, 2).

(B) Schema and description of the bifunctional GlmU protein of *E. coli* (WP\_000933736) (3).

(C) Eukaryotic (*Homo sapiens*, green) and bacterial (*Escherichia coli*, purple) pathways for conversion of D-glucosamine 6-P to NAG-1-P involve different enzymes and intermediates.

(D) Comparison of *E. coli* GlmU with *Rickettsia typhi* GlmU (AAU03917) illustrates that rickettsial GlmU proteins have lost the C-terminal acetyltransferase domain. Sequences were obtained from GenBank and aligned with MUSCLE (default parameters) (4). Domain colors above alignment correspond to description in panel B.

(E) PGN biosynthesis by *Rickettsia* spp. requires import of NAG-1-P, L-alanine (L-Ala) and *trans,trans*-farnesyl-PP (FPP) from the host. NAG-1-P is converted to UDP-*N*-acetyl-alpha-D-glucosamine (UDP-NAG) via the uridylyltransferase GlmU<sub>N</sub>, with the subsequent pathway to Lipid II (green arrows) highly conserved in *Rickettsia* genomes (see [Fig. S10](#)). Via alanine racemase (Alr), imported L-Ala is converted to D-Ala, which is incorporated into the stem peptide by D-alanine--D-alanine ligase A (DdlA). Imported FPP is converted via IspU and PgpB in to *di-trans,poly-cis*-undecaprenyl-P (orange arrows), which serves as the lipid carrier for Lipid I and

Lipid II (see Fig. 3 of the manuscript for more details). At least nine conserved enzymes participate in incorporation of PGN into the murine sacculus (red). The pathway for PGN recycling (purple arrows) initiates with subunit excision via lytic transglycosylases (Slt and RvhB1). Individual subunits are imported back to the cytoplasm via AmpG transporters, which are present in multiple divergent copies in each *Rickettsia* genome (5). The full Gram-negative bacterial PGN recycling pathway is shown (6), with enzymes lacking in *Rickettsia* genomes marked with red Xs. This minimal set of enzymes generates two recyclable products (purple ellipses), while the fate of the remaining degraded products (light green ellipses) is unknown.

(F) Lipopolysaccharide biosynthesis by *Rickettsia* spp. requires import of NAG-1-P, D-ribose 5-P and UDP-glucose from the host. GlmU\_N converts imported NAG-1-P to UDP-NAG, which enters the Raetz pathway (7) for synthesis of Kdo<sub>2</sub>-lipid A (light blue arrows). Imported D-ribose 5-P is converted to D-ribulose 5-P via ribose-5-phosphate isomerase B (RpiB), leading to synthesis of CMP-Kdo. A pathway hole (gray circle) indicates the absence of a phosphatase to convert 3-deoxy-D-manno-octulosonate 8-P to 3-deoxy-D-manno-octulosonate (Kdo) (see panels G-I). The incorporation of various fatty acids into the growing lipid A moiety is shown (pink arrows). Acyl chain incorporation into Lipid A follows the structure deduced for *R. typhi* (8). UDP-NAG is also ligated to *di-trans,poly-cis*-undecaprenyl-P via undecaprenyl-P alpha-N-acetylglucosaminyl 1-P transferase (WecA) (orange arrows), creating the lipid carrier for O-antigen (see Fig. 3 of the manuscript for more details). UDP-N-acetylglucosamine 2-epimerase (WecB) also utilizes UDP-NAG to generate UDP-N-acetyl-D-mannosamine (UDP-ManNAc). Imported UDP-glucose is converted to UDP-glucuronate (UDP-GlcA) and UDP-alpha-D-galactose (UDP-Gal) via UDP-glucose 6-dehydrogenase (Udg) and the epimerase/dehydratase FnIA, respectively. UDP-ManNAc, UDP-GlcA and UDP-Gal are predicted to be the main sugars used by peripheral enzymes (e.g., glycosyltransferases, glucosyltransferases, etc.) that polymerize O-antigen and extend the Kdo<sub>2</sub>-lipid A acceptor.

(G) The pathway from D-Ribulose 5-P to CMP-Kdo is highly conserved across 2227 bacterial genomes (all prokaryotic genomes with an available Kdo<sub>2</sub>-lipid A biosynthesis pathway at KEGG).

The star depicts the pathway hole (no KdsC) in the *Rickettsia* CMP-Kdo pathway.

(H) Relative to the predominant “*E. coli*-like” pathway, the “*Rickettsia*-like” pathway for CMP-Kdo biosynthesis is far less common, occurring in 442 bacterial genomes (excluding *Rickettsia* genomes). The pathway hole (no KdsC) is noted with a red X.

(I) Taxonomic breakdown of bacterial species containing the “*Rickettsia*-like” CMP-Kdo biosynthesis pathway (442 total genomes). Genomes from intracellular species represent 41% of the total number of “*Rickettsia*-like” pathways.

## REFERENCES

1. **Frohlich KM, Audia JP.** 2013. Dual mechanisms of metabolite acquisition by the obligate intracytosolic pathogen *Rickettsia prowazekii* reveal novel aspects of triose phosphate transport. *J Bacteriol* **195**:3752–60.
2. **Frohlich KM, Roberts RAW, Housley NA, Audia JP.** 2010. *Rickettsia prowazekii* uses an sn-glycerol-3-phosphate dehydrogenase and a novel dihydroxyacetone phosphate transport system to supply triose phosphate for phospholipid biosynthesis. *J Bacteriol* **192**:4281–8.
3. **Gehring AM, Lees WJ, Mindiola DJ, Walsh CT, Brown ED.** 1996. Acetyltransfer Precedes Uridyltransfer in the Formation of UDP- *N*-acetylglucosamine in Separable Active Sites of the Bifunctional GlmU Protein of *Escherichia coli* †. *Biochemistry* **35**:579–585.
4. **Edgar RC.** 2004. MUSCLE: Multiple sequence alignment with high accuracy and high throughput. *Nucleic Acids Res* **32**:1792–1797.
5. **Gillespie JJ, Joardar V, Williams KP, Driscoll T, Hostetler JB, Nordberg E, Shukla M, Walenz B, Hill CA, Nene VM, Azad AF, Sobral BW, Caler E.** 2012. A *Rickettsia*

genome overrun by mobile genetic elements provides insight into the acquisition of genes characteristic of an obligate intracellular lifestyle. *J Bacteriol* **194**:376–94.

6. **Park JT, Uehara T.** 2008. How bacteria consume their own exoskeletons (turnover and recycling of cell wall peptidoglycan). *Microbiol Mol Biol Rev* **72**:211–27, table of contents.
7. **Whitfield C, Trent MS.** 2014. Biosynthesis and Export of Bacterial Lipopolysaccharides. *Annu Rev Biochem* **83**:99–128.
8. **Fodorová M, Vadovič P, Toman R.** 2011. Structural features of lipid A of *Rickettsia typhi*. *Acta Virol* **55**:31–44.

**A**

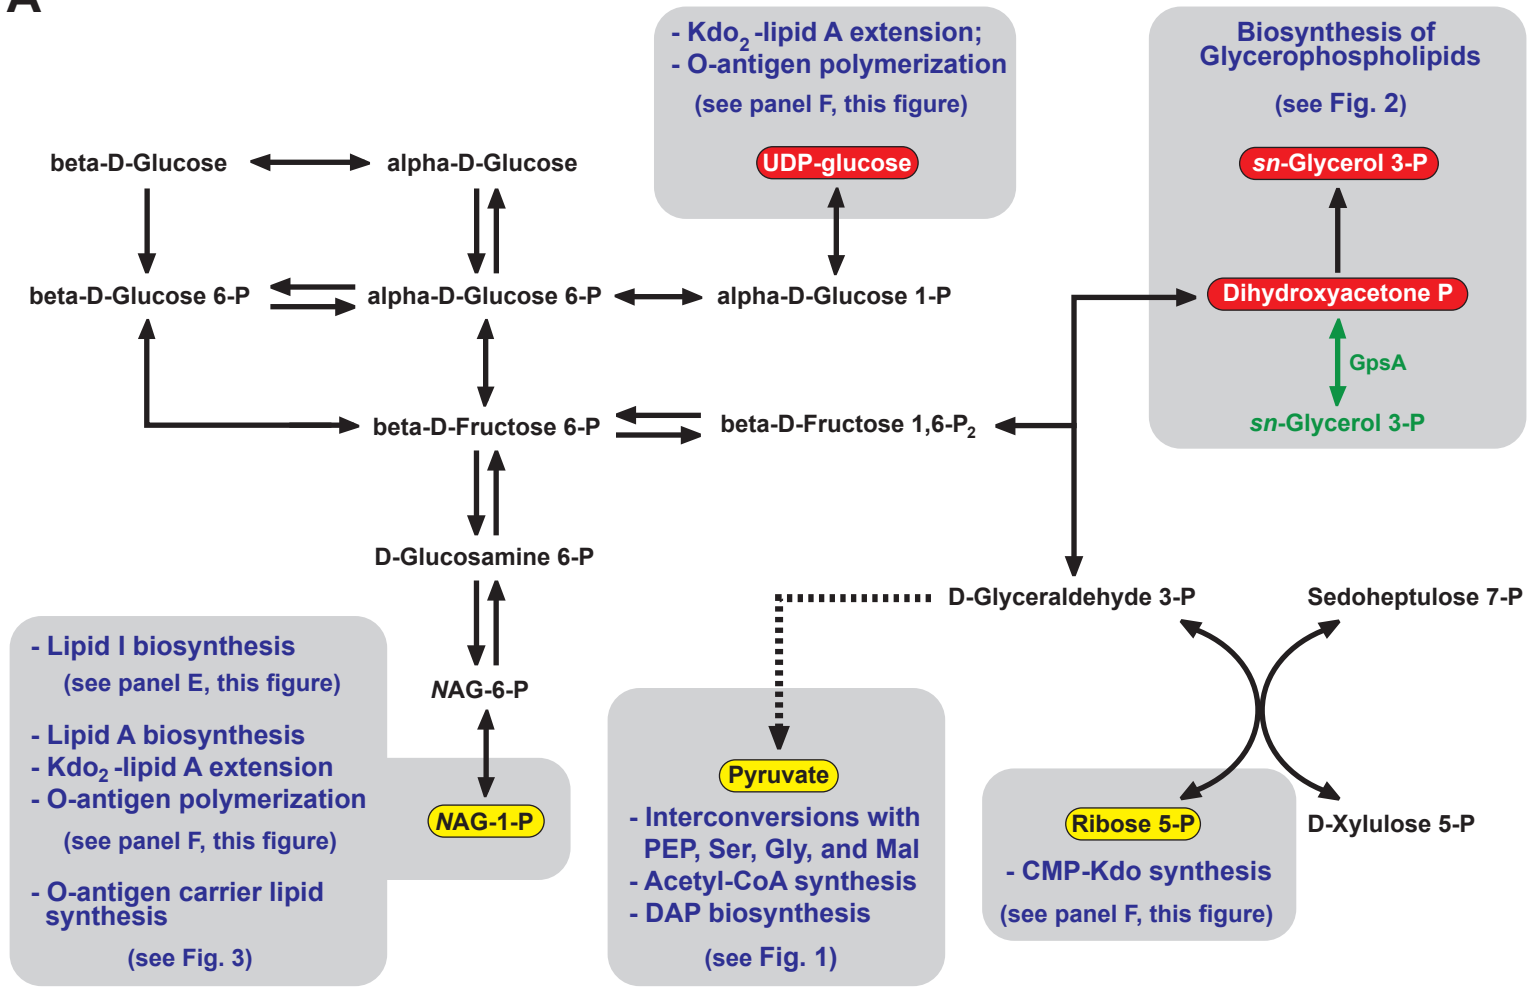

**B**

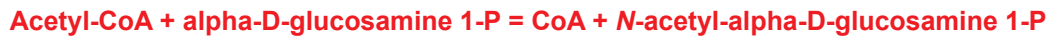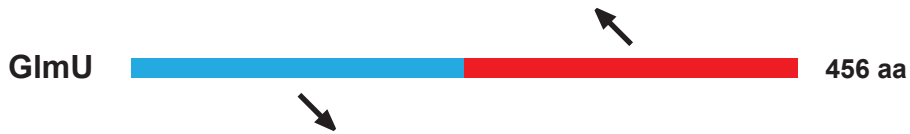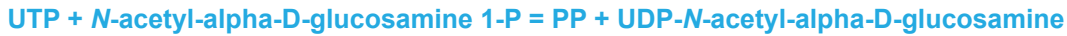

**C**

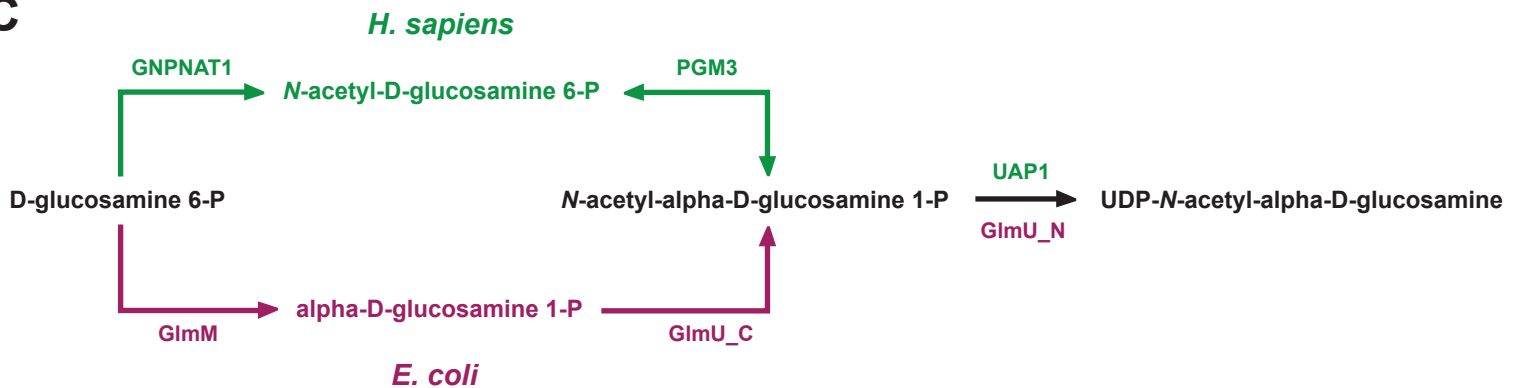

FIG. S1

D

|                 |                                                                                       |     |
|-----------------|---------------------------------------------------------------------------------------|-----|
| <i>E. coli</i>  | MLNNA-MSVVILAAGKGRMYS <del>DLPKVLHTLAGKAMVQHVIDAANELGAAHVHLVYGHGG</del>               | 59  |
| <i>R. typhi</i> | MLHNENYQIIILAAGKGRMES <del>DLPKVMHEVGGVPMLETVLKNALKI-THDVIIVY---S</del>               | 56  |
|                 | ***. * . : : ***** * : : * . * : : * : : * : : * : : * : : *                          |     |
| <i>E. coli</i>  | DLLKQALK--DDNLNWVLQAEQLGTGHAMQQAAPFFADDEDILMLYGDVPLISVETLQRL                          | 117 |
| <i>R. typhi</i> | EALKKYLTPYENMCRFVLQEEPKGTAAHATHAAIDLIDQNKIILVLYGDHPLITPTLMYEL                         | 116 |
|                 | : * : * . : : . : * * * * * * * * * : * : : : * : * * * * * * * : * : *               |     |
| <i>E. coli</i>  | RDAKPQGGIGLLTVKLD--DPTGYGRITRE-NGKVTGIVEHKDATDEQRQIQEINTGILI                          | 174 |
| <i>R. typhi</i> | IDYLSIINAALVTL <del>SFERANPAQYGR</del> IAIDKHG <del>NFLEIIEYKNASEEKKIKL</del> CNSGIMA | 176 |
|                 | * . . . * : : : : : : * : * * * * : * : : * : : * : * * * * : : * : * * * :           |     |
| <i>E. coli</i>  | ANGADMKRWLAKLTNN--NAQGEYYITDIIALAYQEGREIVAVHPQRLSEVEGVNRLQL                           | 232 |
| <i>R. typhi</i> | FSSGILNKYLP <del>LFANNNTNCNQEIYLTEIVKICKNHGEKVS</del> YLLSTDHDLIVGINTQSEL             | 236 |
|                 | ... : : : * . : * * * * * : : * * * * * : : * : * : : . : * : * . . : *               |     |
| <i>E. coli</i>  | SRLERVYQSEQA <del>EKLLLAGVMLRDPARFDL</del> RGTLTHGRDVEIDTNVIEGNVTLGHRVKI              | 292 |
| <i>R. typhi</i> | KEANNIFFQ <del>NKS</del> -----                                                        | 248 |
|                 | . : : : * : : :                                                                       |     |
| <i>E. coli</i>  | GTGCVIKNSVIGDDCEISPYTVVEDANLAAACTIGPFARLRPGAELLEGAHVGNFVEMKK                          | 352 |
| <i>R. typhi</i> | -----                                                                                 | 248 |
| <i>E. coli</i>  | ARLGKGSKAGHLTYLGD <del>AEIGDNVNIGAGTITCNYDGANKFKTIIGDDV</del> FVGS <del>DTQLVAP</del> | 412 |
| <i>R. typhi</i> | -----                                                                                 | 248 |
| <i>E. coli</i>  | VTVGKGATIAAGT <del>TVTRNVGENALAI</del> SRV <del>PQTQKEGWRRPV</del> KKK                | 456 |
| <i>R. typhi</i> | -----                                                                                 | 248 |

FIG. S1

E

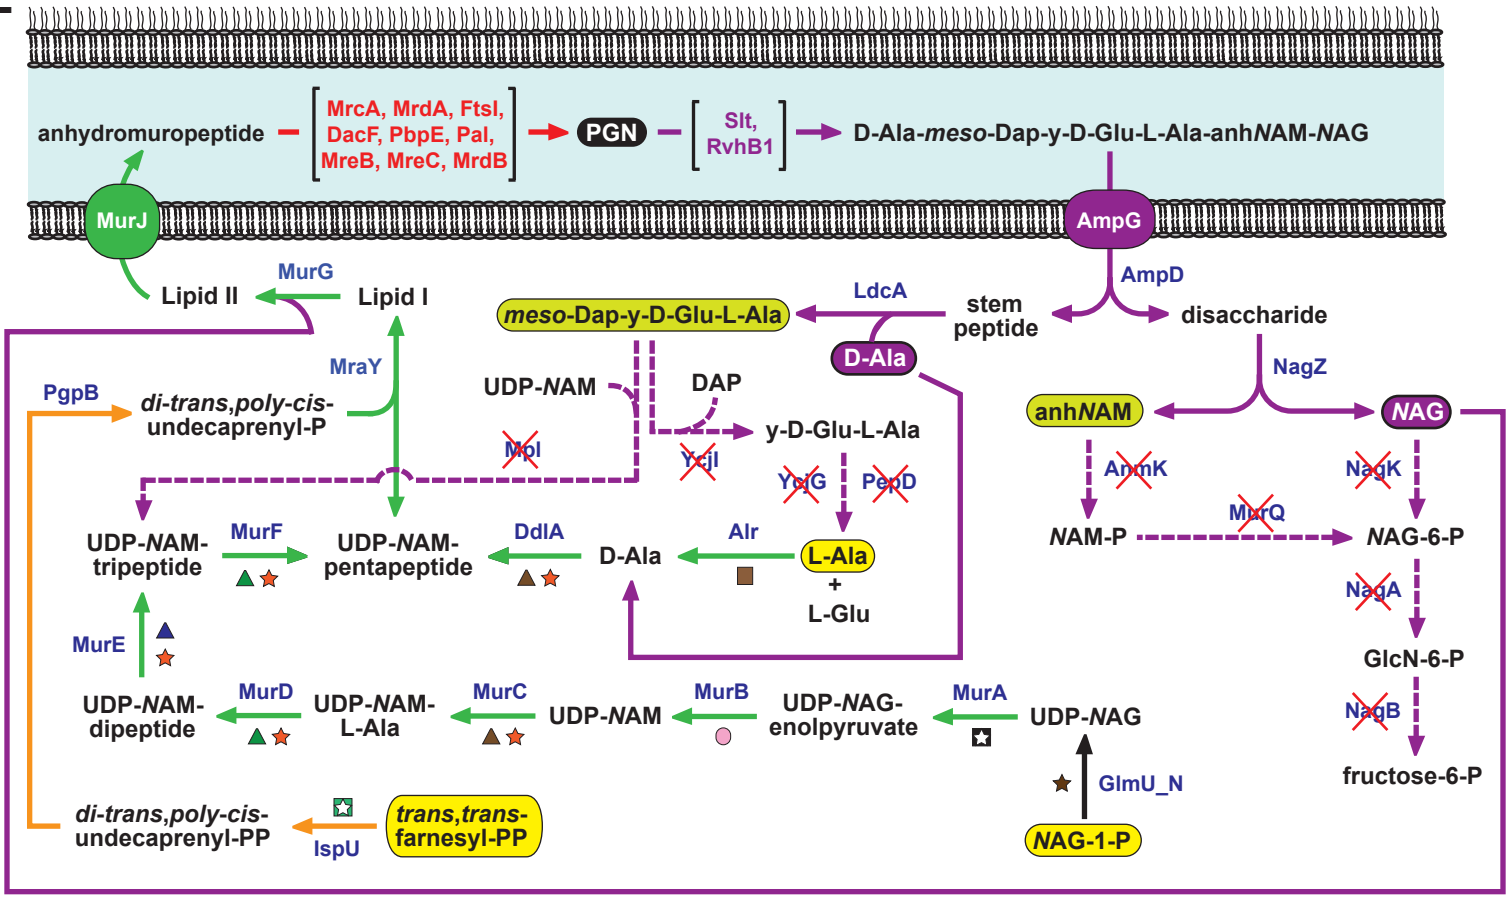

F

FIG. S1

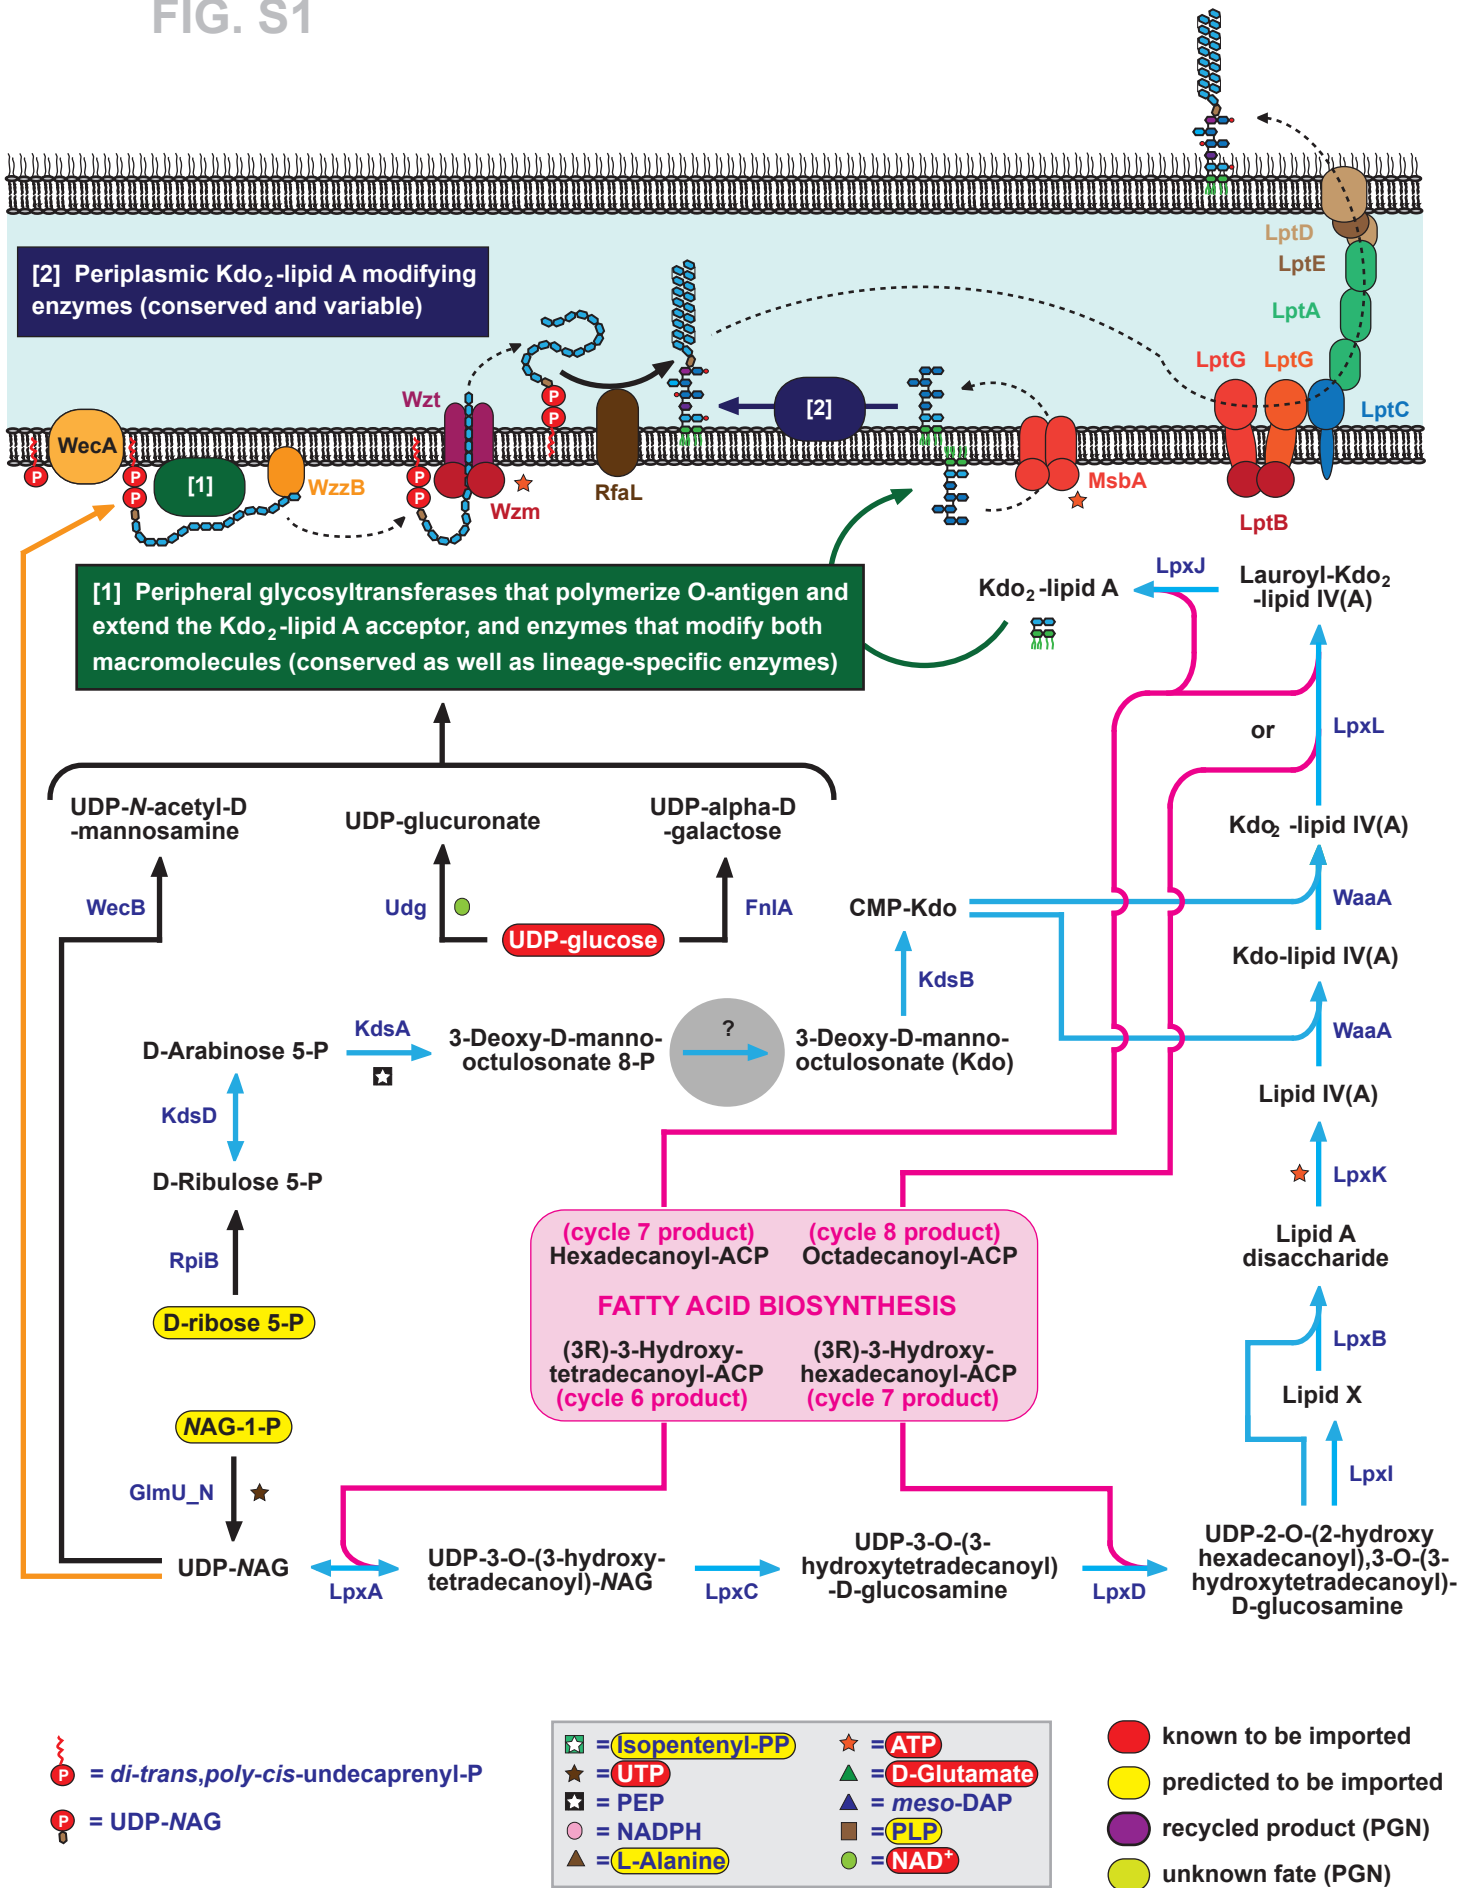

G

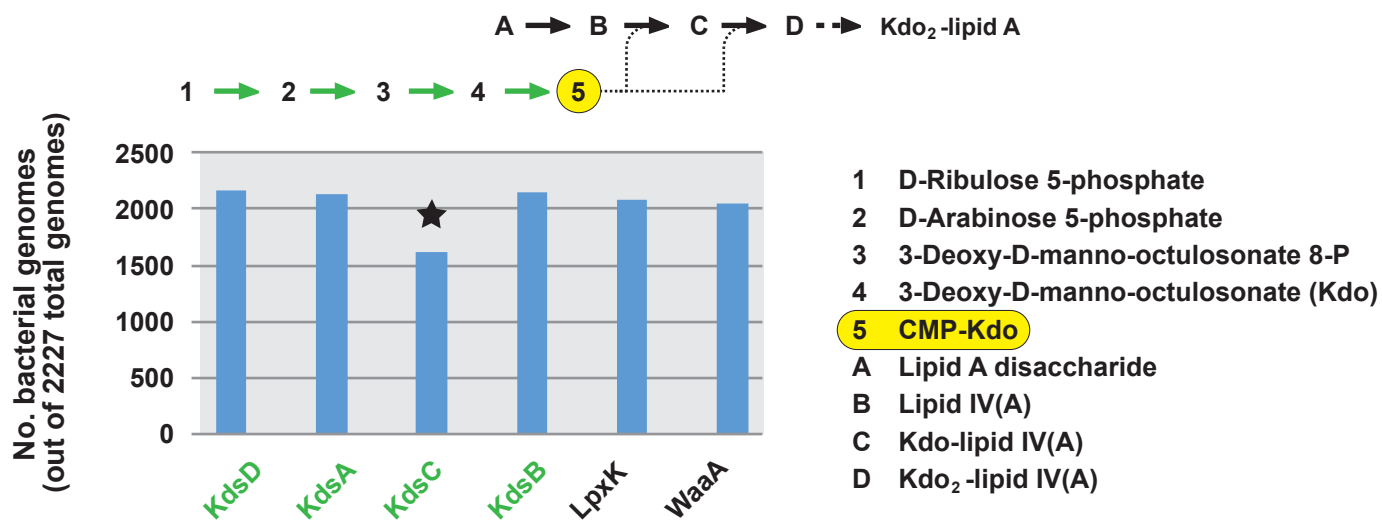

H

| Pathway                 | Composition                  | No. genomes |
|-------------------------|------------------------------|-------------|
| <i>E. coli</i> -like    | 1 → 2 → 3 → 4 → 5            | 1505        |
| <i>Rickettsia</i> -like | 1 → 2 → 3 → <del>4</del> → 5 | 442         |

I

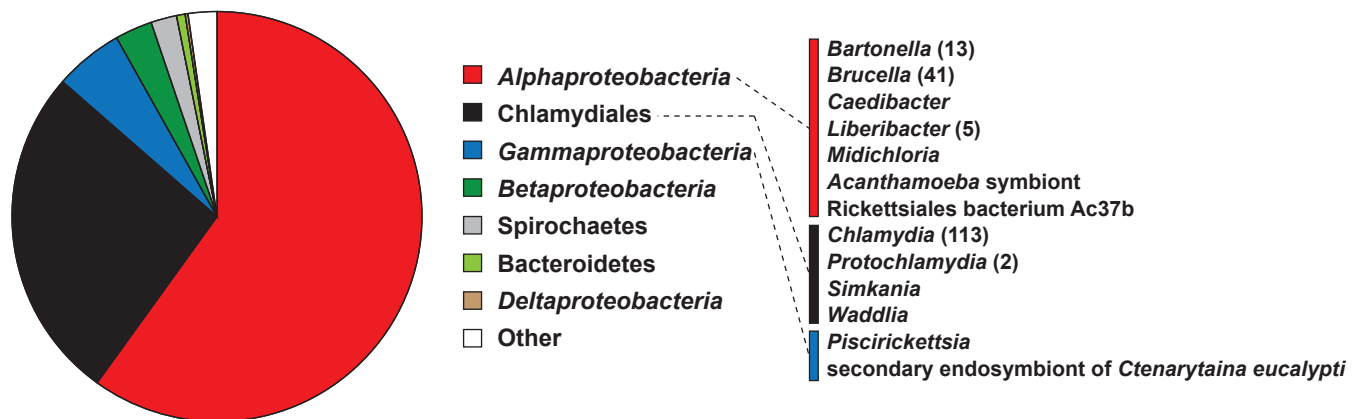

FIG. S1
