# Supplementary material for: Wholly Rickettsia! Reconstructed Metabolic Profile of the Quintessential Bacterial Parasite of Eukaryotic Cells
Source: PubMed Central journal article supplement (PMC5615194; doi:10.1128/mbio.00859-17), 2017-09-26
Supplement: mbo005173495sf8.pdf [file mbo005173495sf8.pdf]

**FIG S8. Phylogeny estimation of isopentenyl-diphosphate delta-isomerase (*idi*) and queuosine biosynthesis (*queD,E,C,F,A,H*) genes.**

(A-H) Phylogeny estimations of Idi (A), Tgt (B), QueD (C), QueE (D), QueC (E), QueF (F), QueA (G), and QueH (H) proteins. Datasets for each protein were constructed as follows: the rickettsial protein was used in blastp queries against several taxon-specific databases: 1) “Rickettsiales”, 2) “Holosporales”, 3) “*Alphaproteobacteria* (minus Rickettsiales and Holosporales)”, 4) “*Proteobacteria* (minus *Alphaproteobacteria*)”, 5) “Bacteria (minus *Proteobacteria*)”, and 6) “minus Bacteria”. The top 5-10 (query-dependent) subjects from each search resulting in significant (> 40 bits) alignments were all compiled and aligned using MUSCLE v3.8.31 (default parameters) (1). Protein phylogenies were estimated under maximum likelihood with RAxML v8.2.4 (2) using a gamma model of rate heterogeneity and estimation of the proportion of invariant sites. Both the Lee and Gascuel (LG) and Blocks of Amino Acid Substitution Matrix (BLOSUM62) models of amino acid substitution were used, and branch support was assessed with 1,000 pseudo-replications.

## REFERENCES

1. **Edgar RC.** 2004. MUSCLE: Multiple sequence alignment with high accuracy and high throughput. *Nucleic Acids Res* **32**:1792–1797.
2. **Stamatakis A.** 2014. RAxML version 8: A tool for phylogenetic analysis and post-analysis of large phylogenies. *Bioinformatics* **30**:1312–1313.

**A**

■ Rickettsiales   
 ■ other *Alphaproteobacteria*   
 ■ other bacteria  
■ other Proteobacteria   
 ■ non-bacteria

Idi: Isopentenyl-diphosphate Delta-isomerase

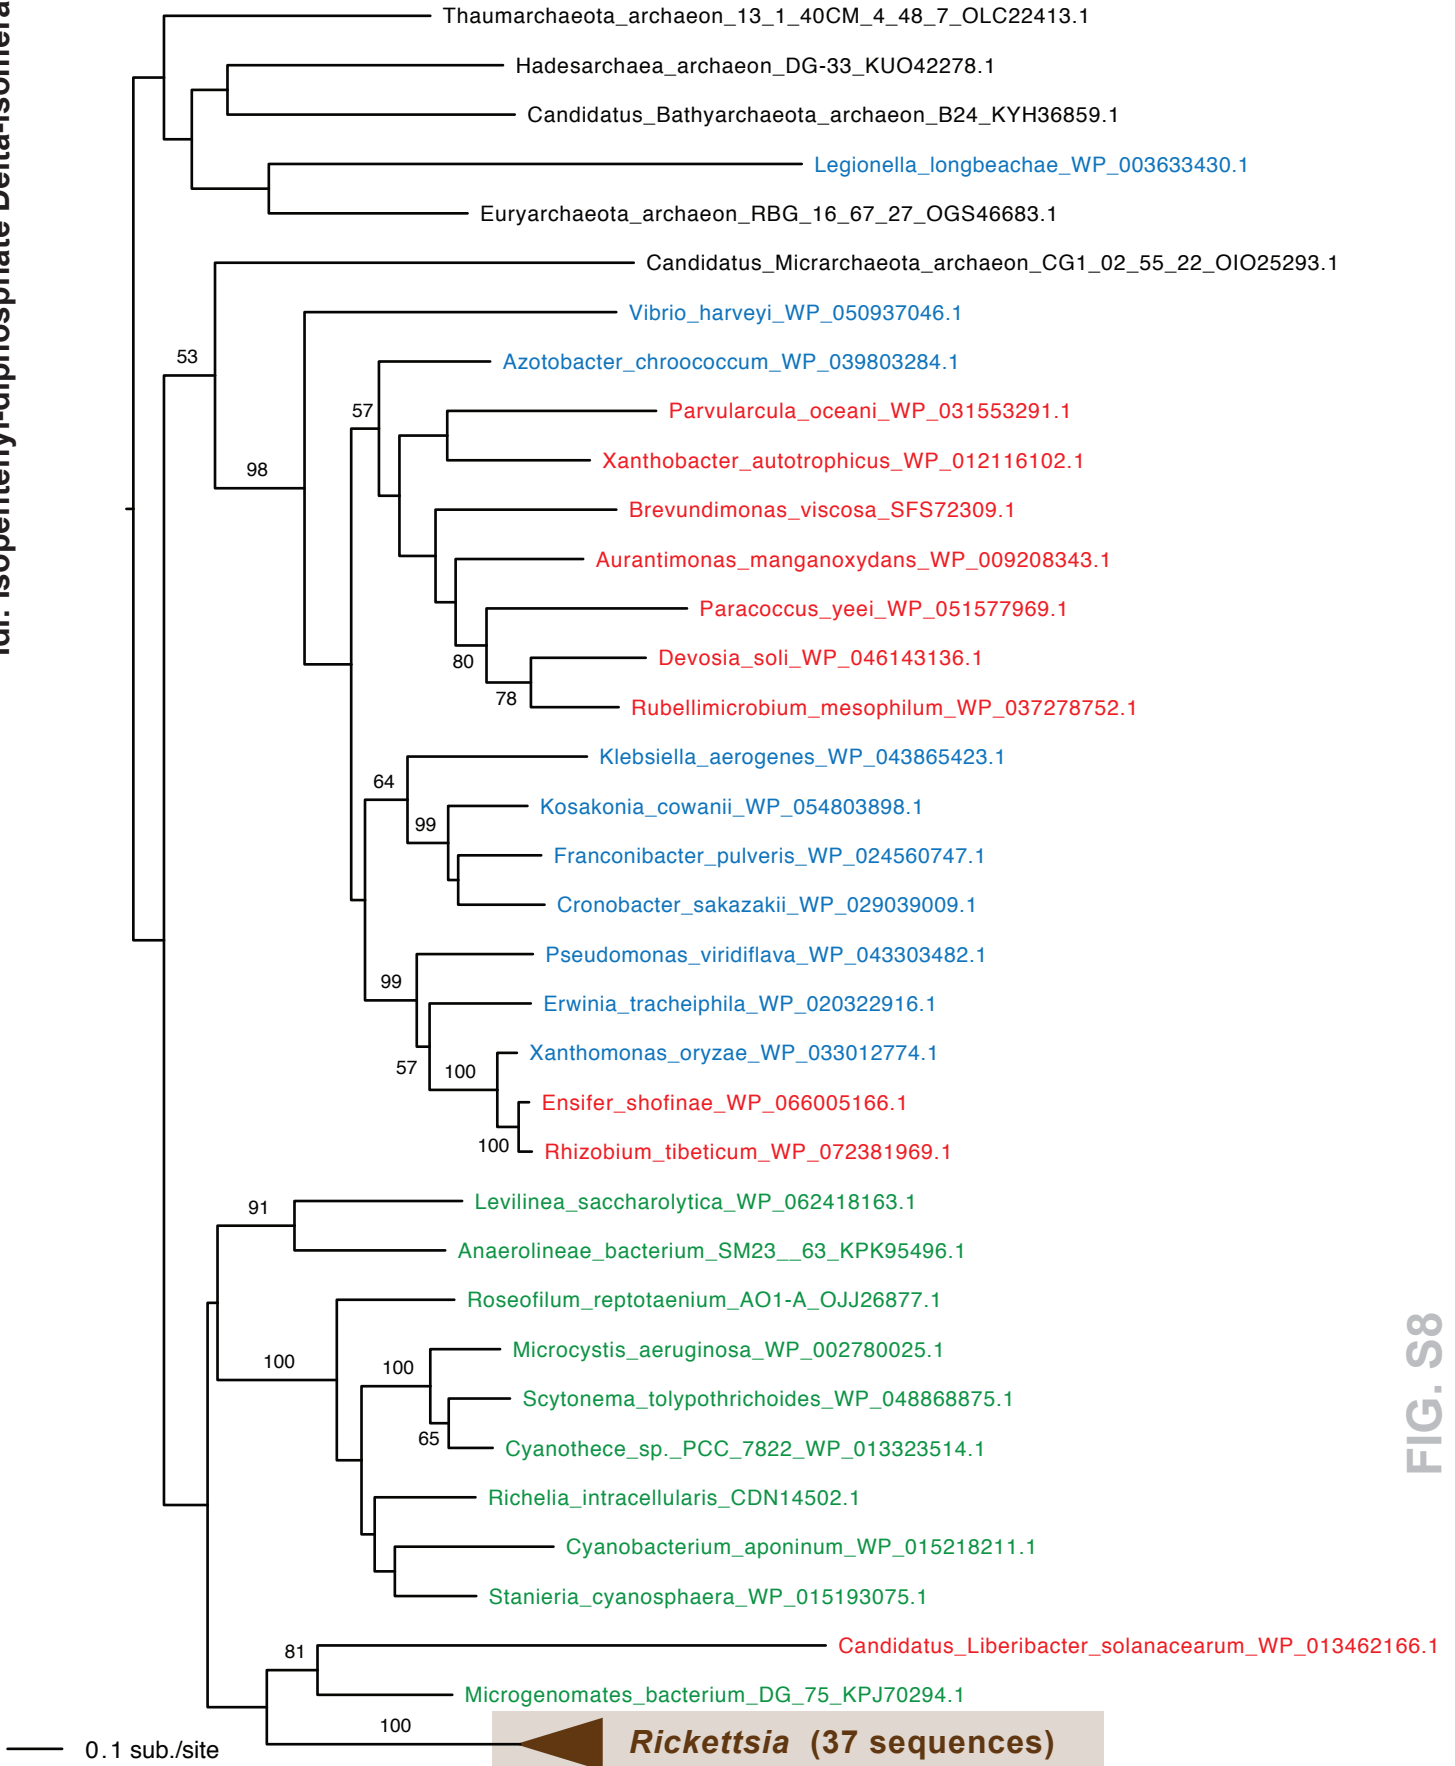

FIG. S8

**B**

■ Rickettsiales    ■ other *Alphaproteobacteria*    ■ other bacteria  
■ Holosporales    ■ other Proteobacteria

Tgt: Queuine tRNA-ribosyltransferase

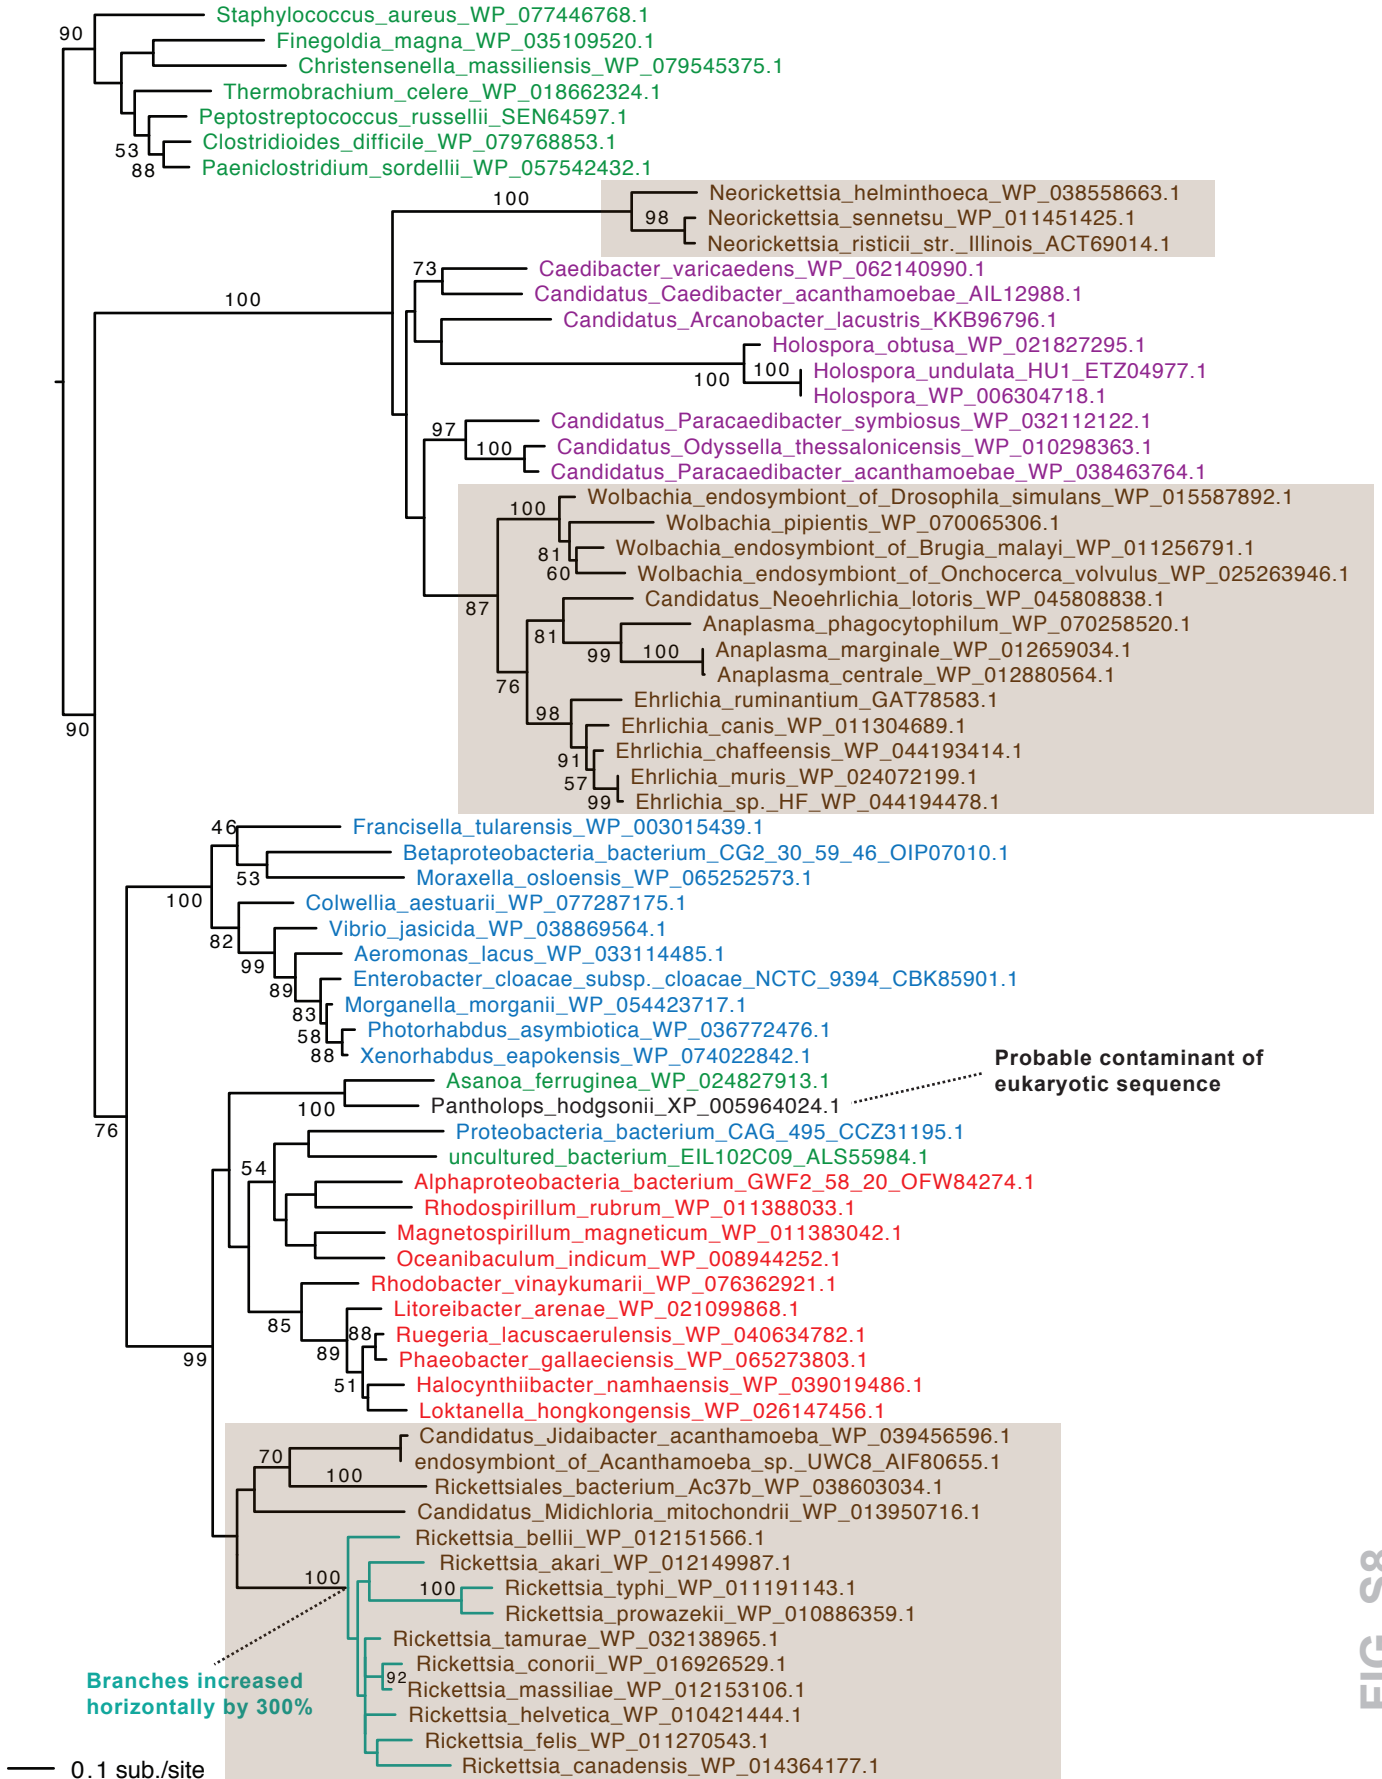

FIG. S8

C

■ Rickettsiales   
 ■ other *Alphaproteobacteria*   
 ■ other bacteria  
■ other Proteobacteria   
 ■ non-bacteria

QueD: 6-carboxy-5,6,7,8-tetrahydropterin synthase

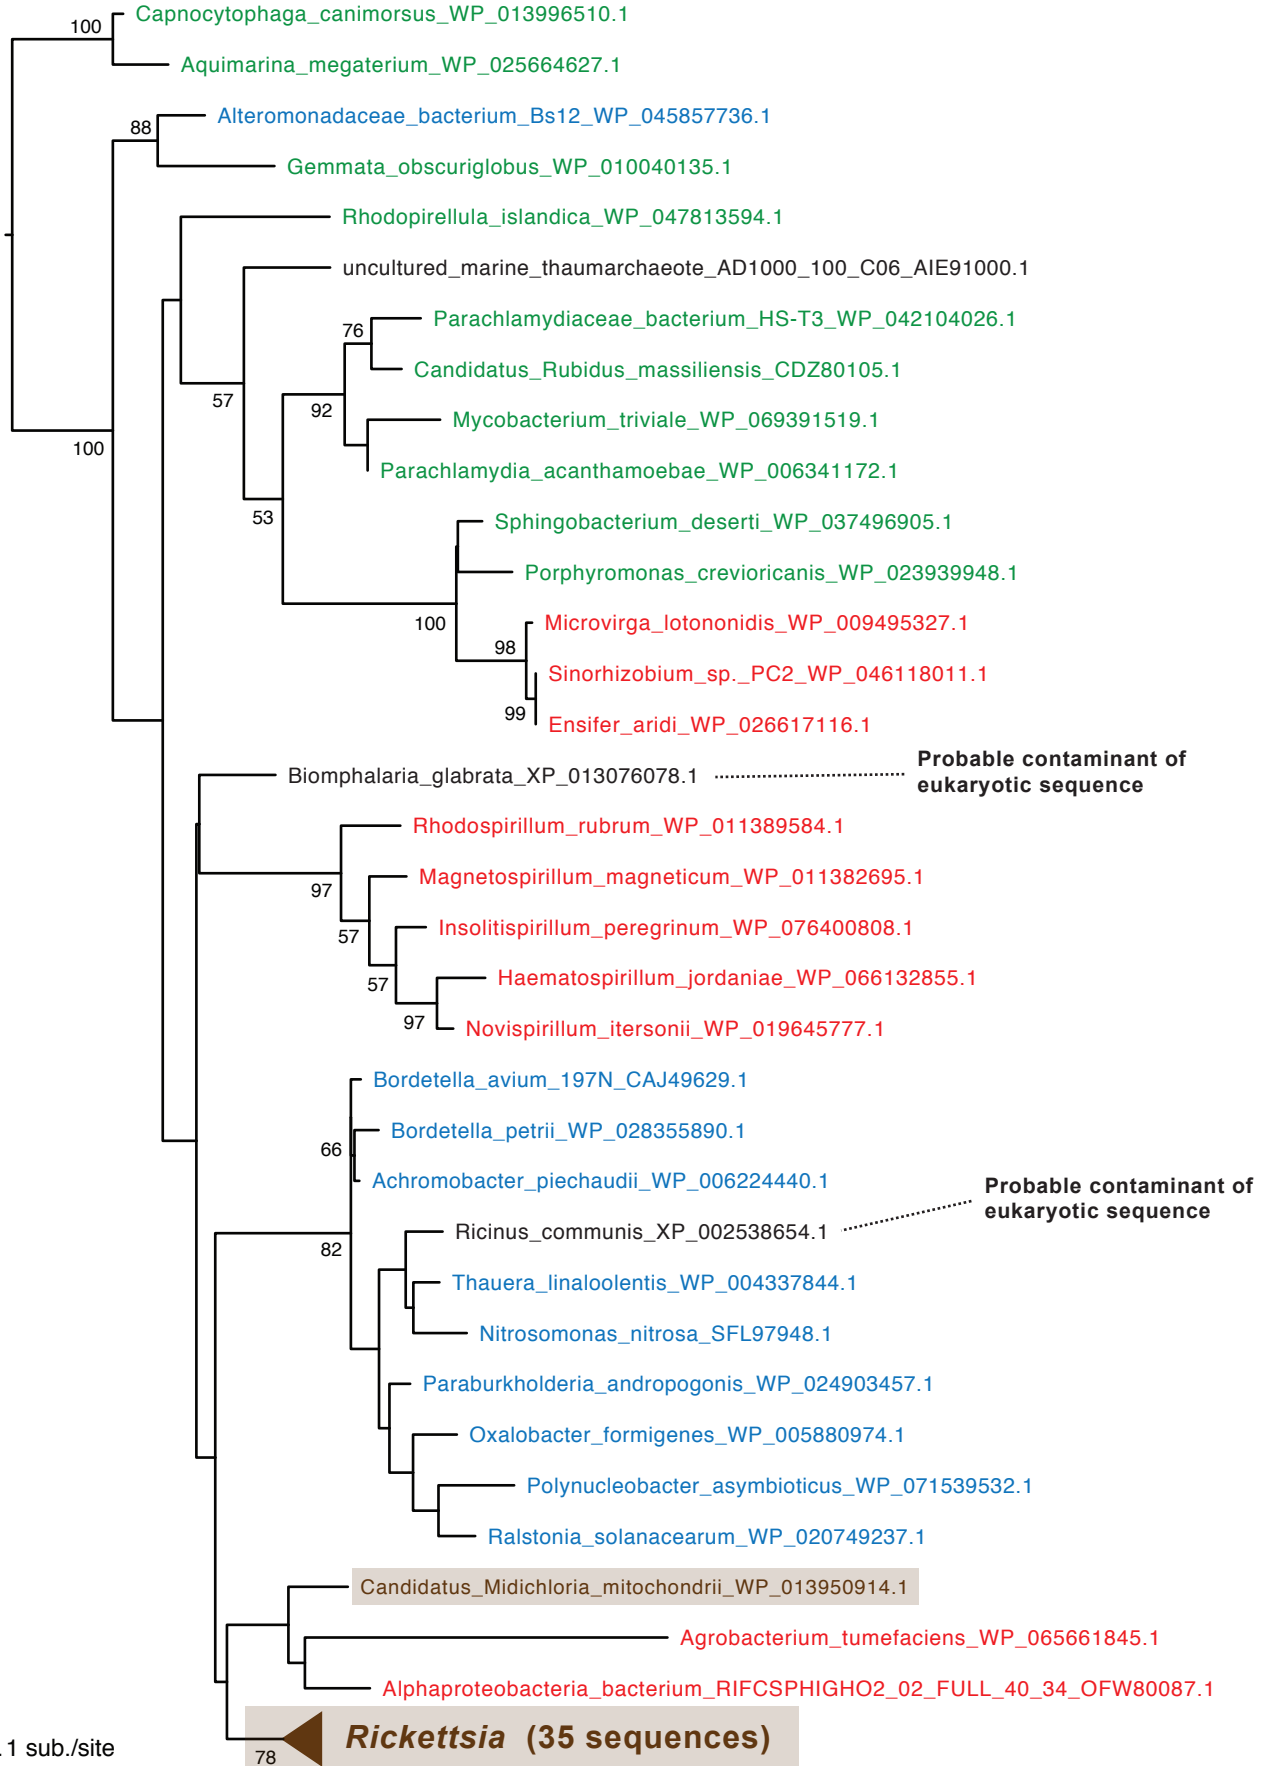

FIG. S8

— 0.1 sub./site

**D**

■ Rickettsiales   
 ■ other *Alphaproteobacteria*   
 ■ other bacteria  
■ other Proteobacteria   
 ■ non-bacteria

**QueE: 7-carboxy-7-deazaguanine synthase**
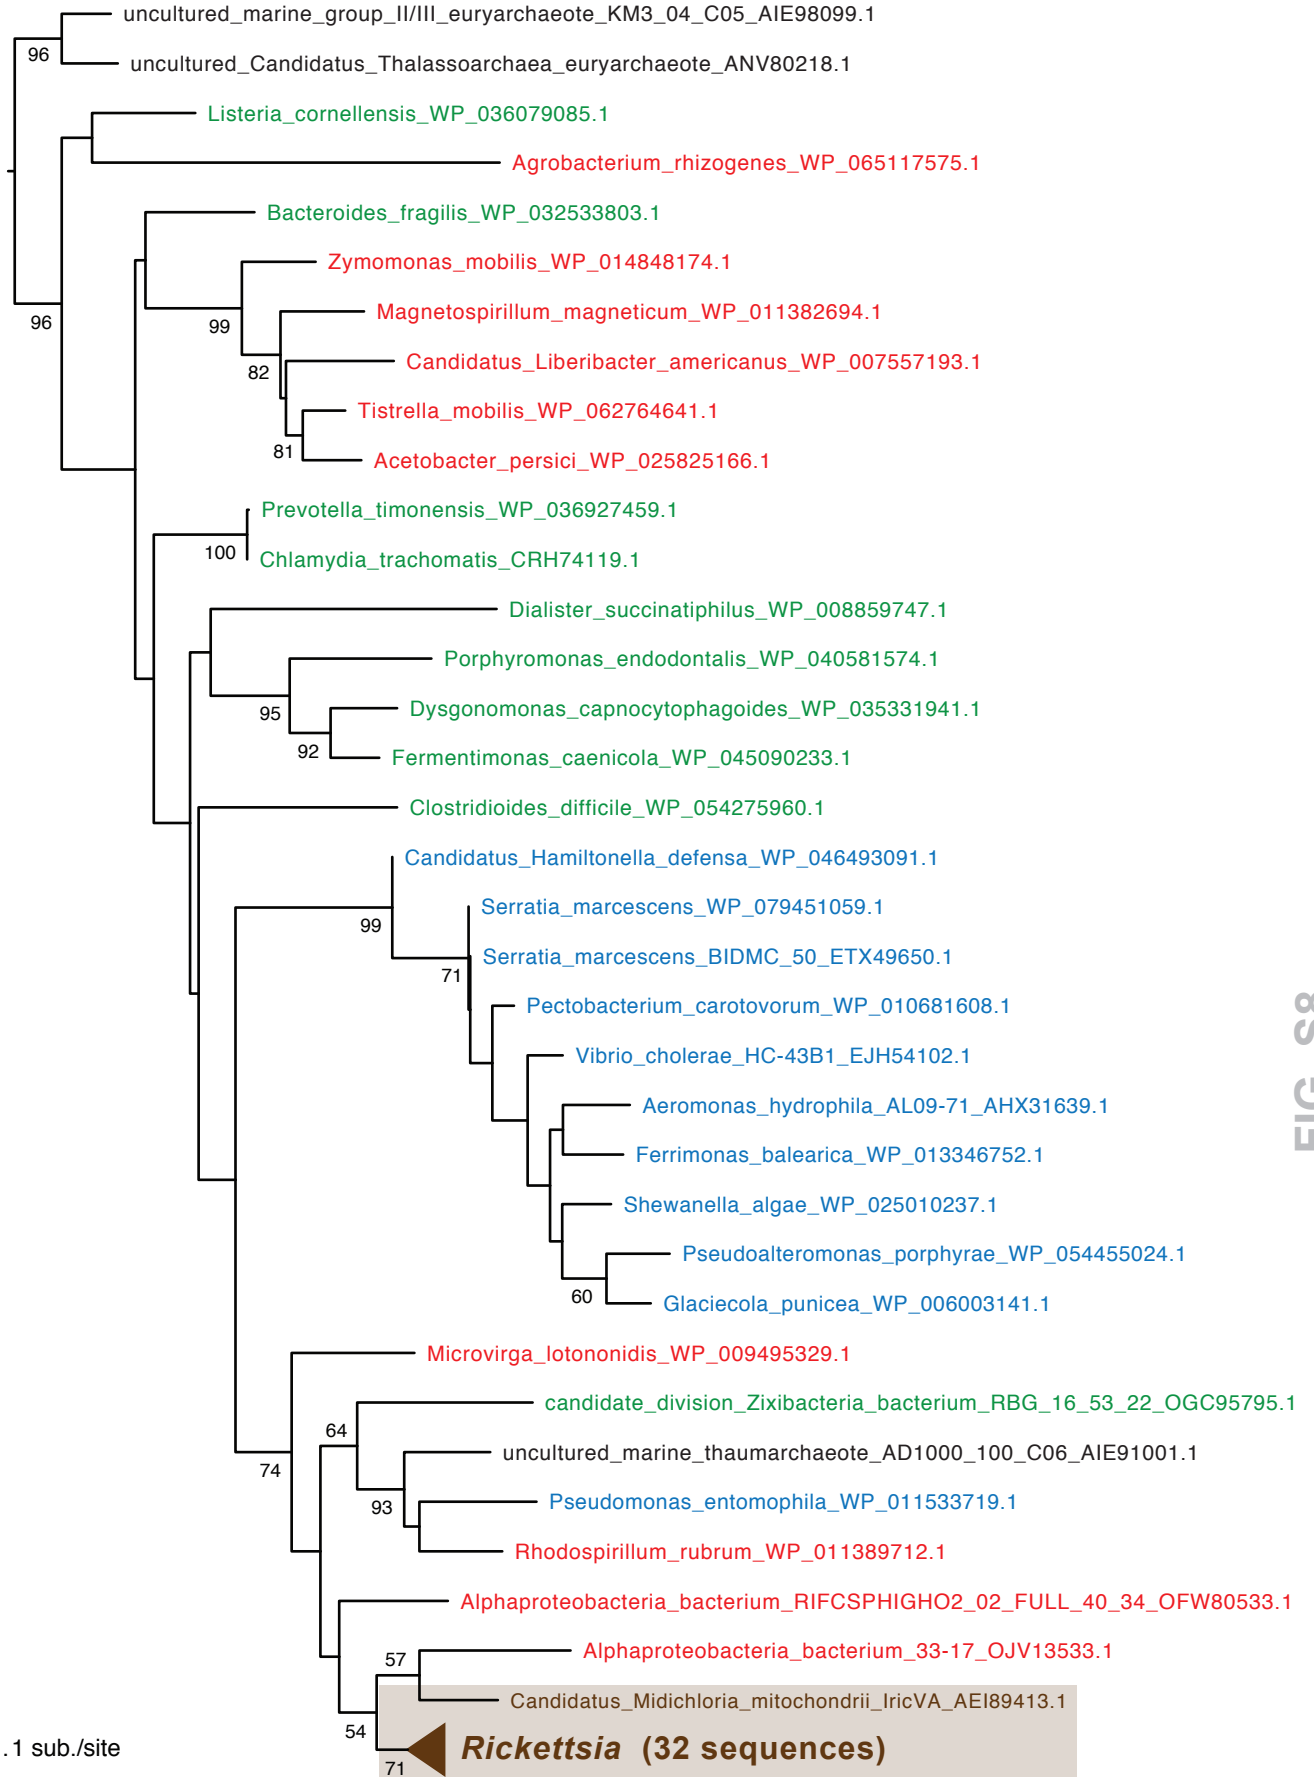
**FIG. S8**

■ Rickettsiales   
 ■ other *Alphaproteobacteria*   
 ■ other bacteria  
■ other Proteobacteria   
 ■ non-bacteria

QueC: 7-cyano-7-deazaguanine synthase

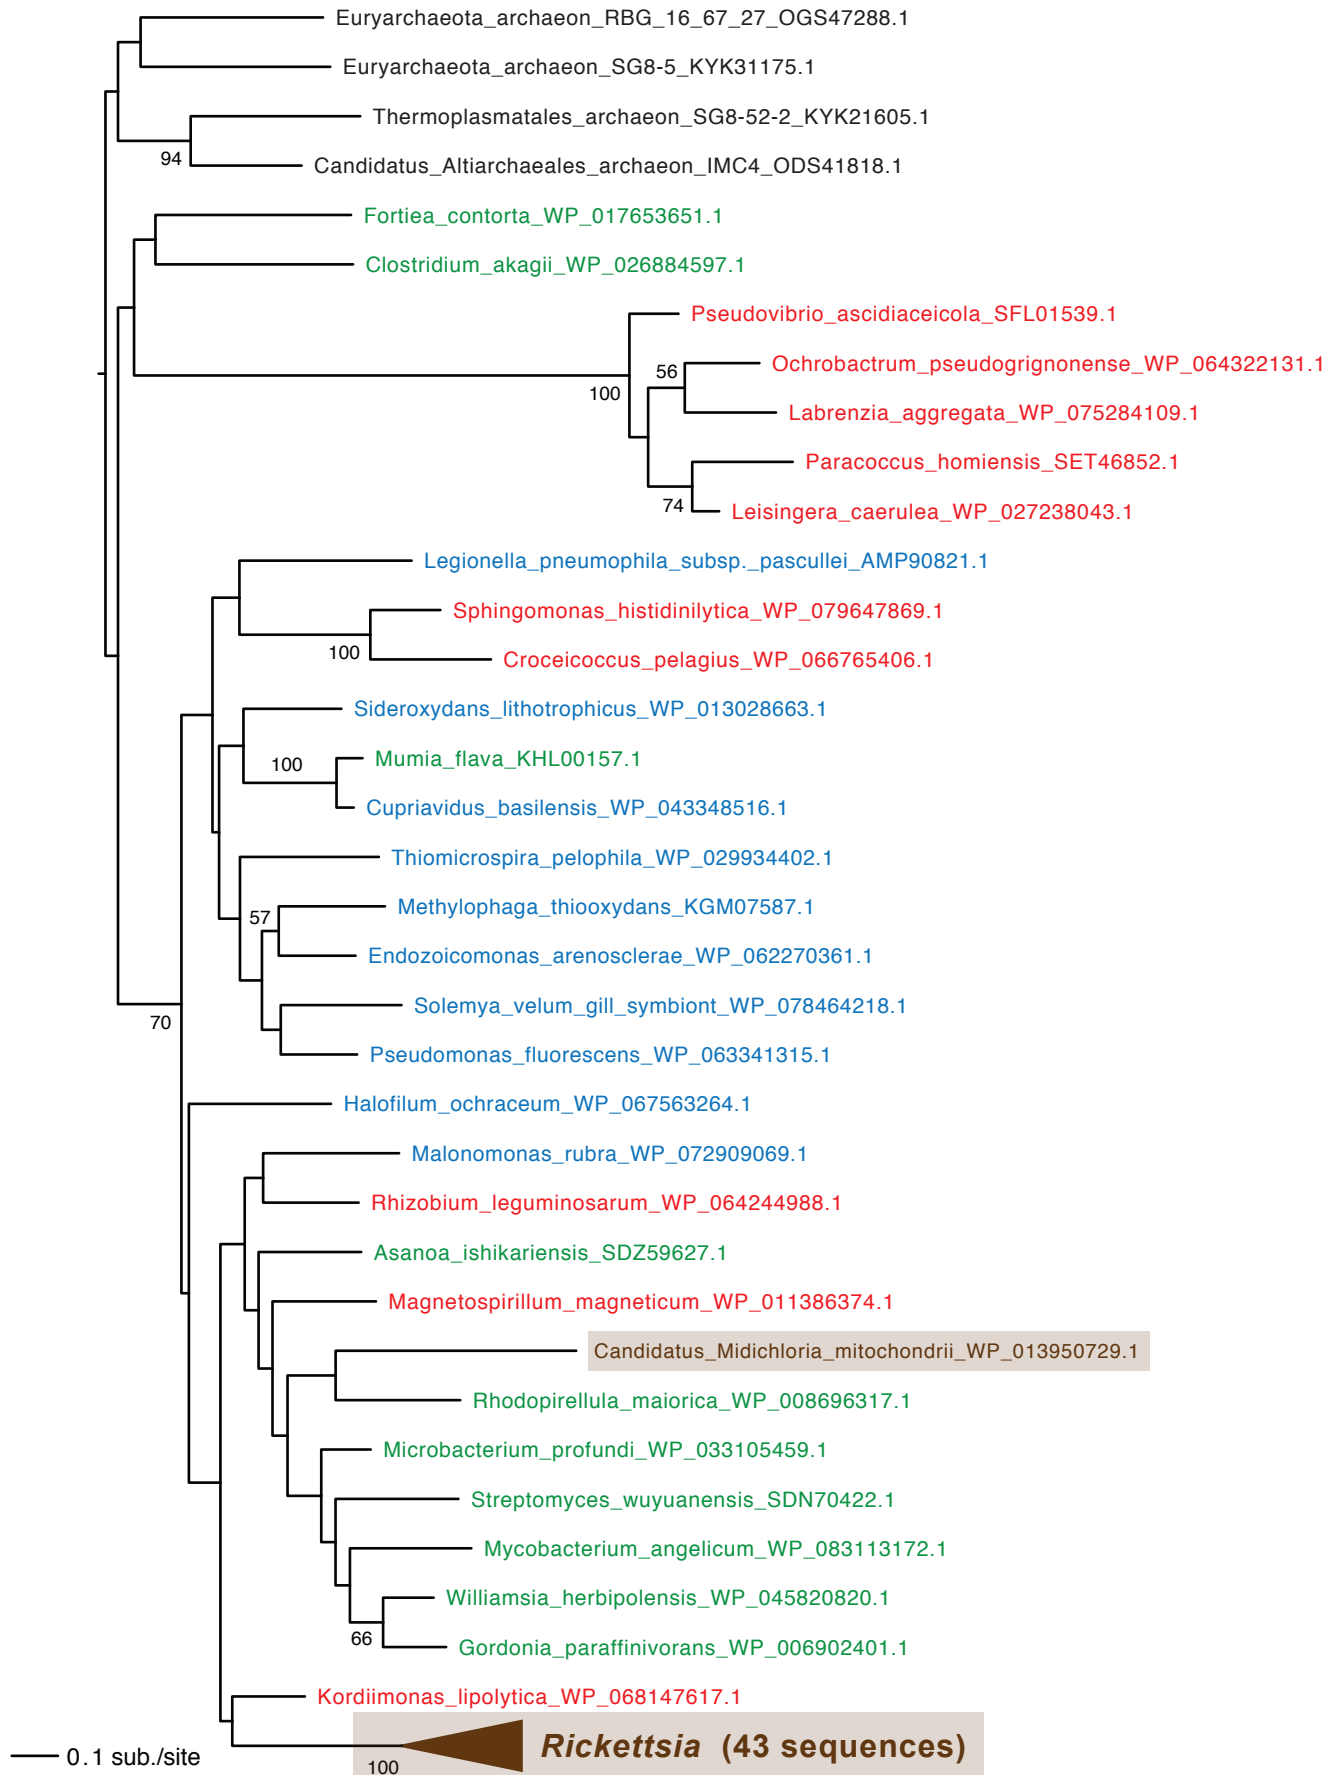

FIG. S8

■ Rickettsiales   
 ■ other *Alphaproteobacteria*   
 ■ other bacteria  
■ other Proteobacteria   
 ■ non-bacteria

QueF: NADPH-dependent 7-cyano-7-deazaguanine reductase

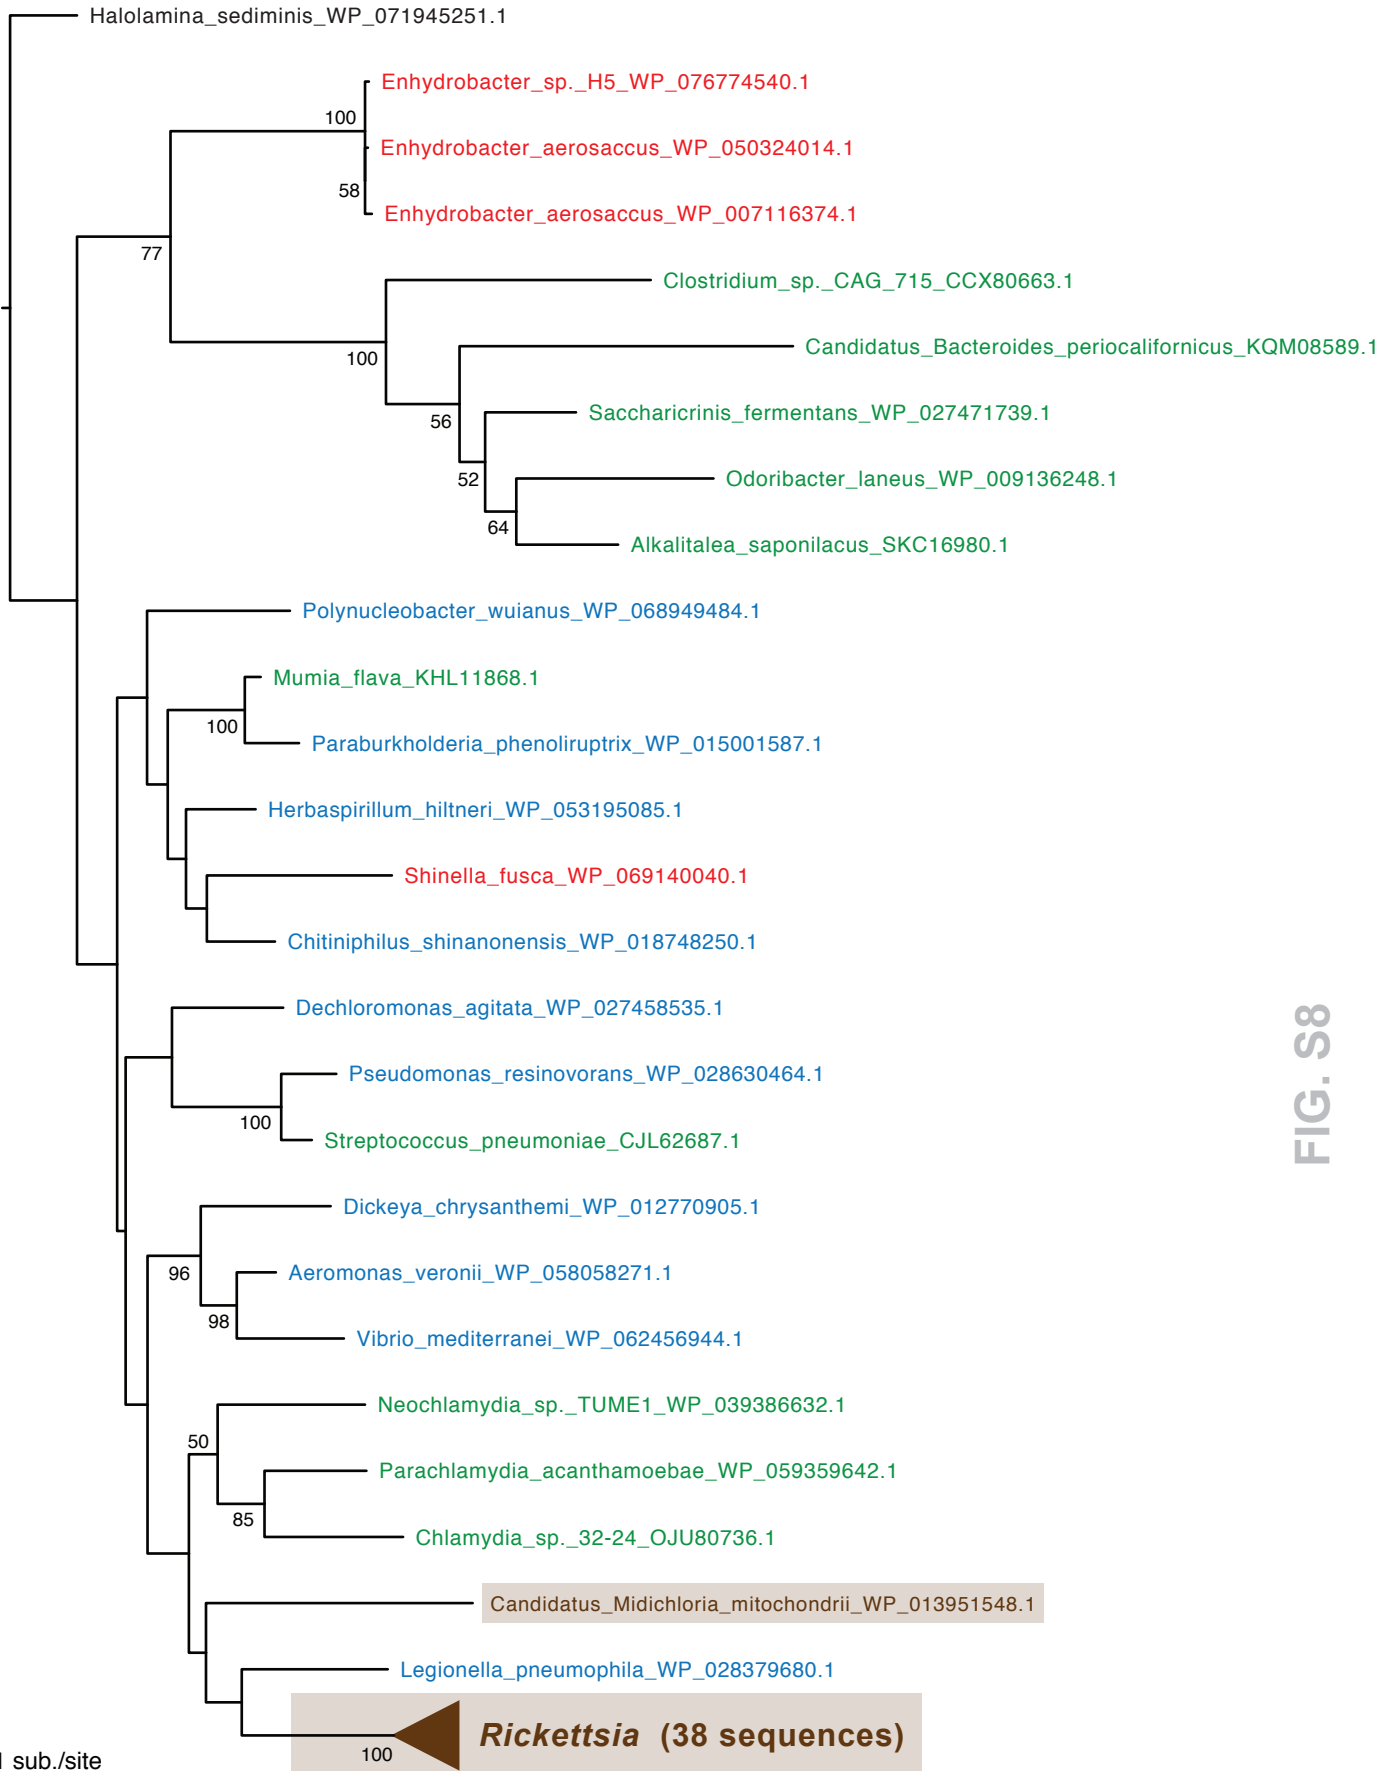

— 0.1 sub./site

FIG. S8

**G**

■ Rickettsiales   
 ■ other *Alphaproteobacteria*   
 ■ other bacteria  
■ other Proteobacteria   
 ■ non-bacteria

**QueA: S-adenosylmethionine:tRNA ribosyltransferase-isomerase**
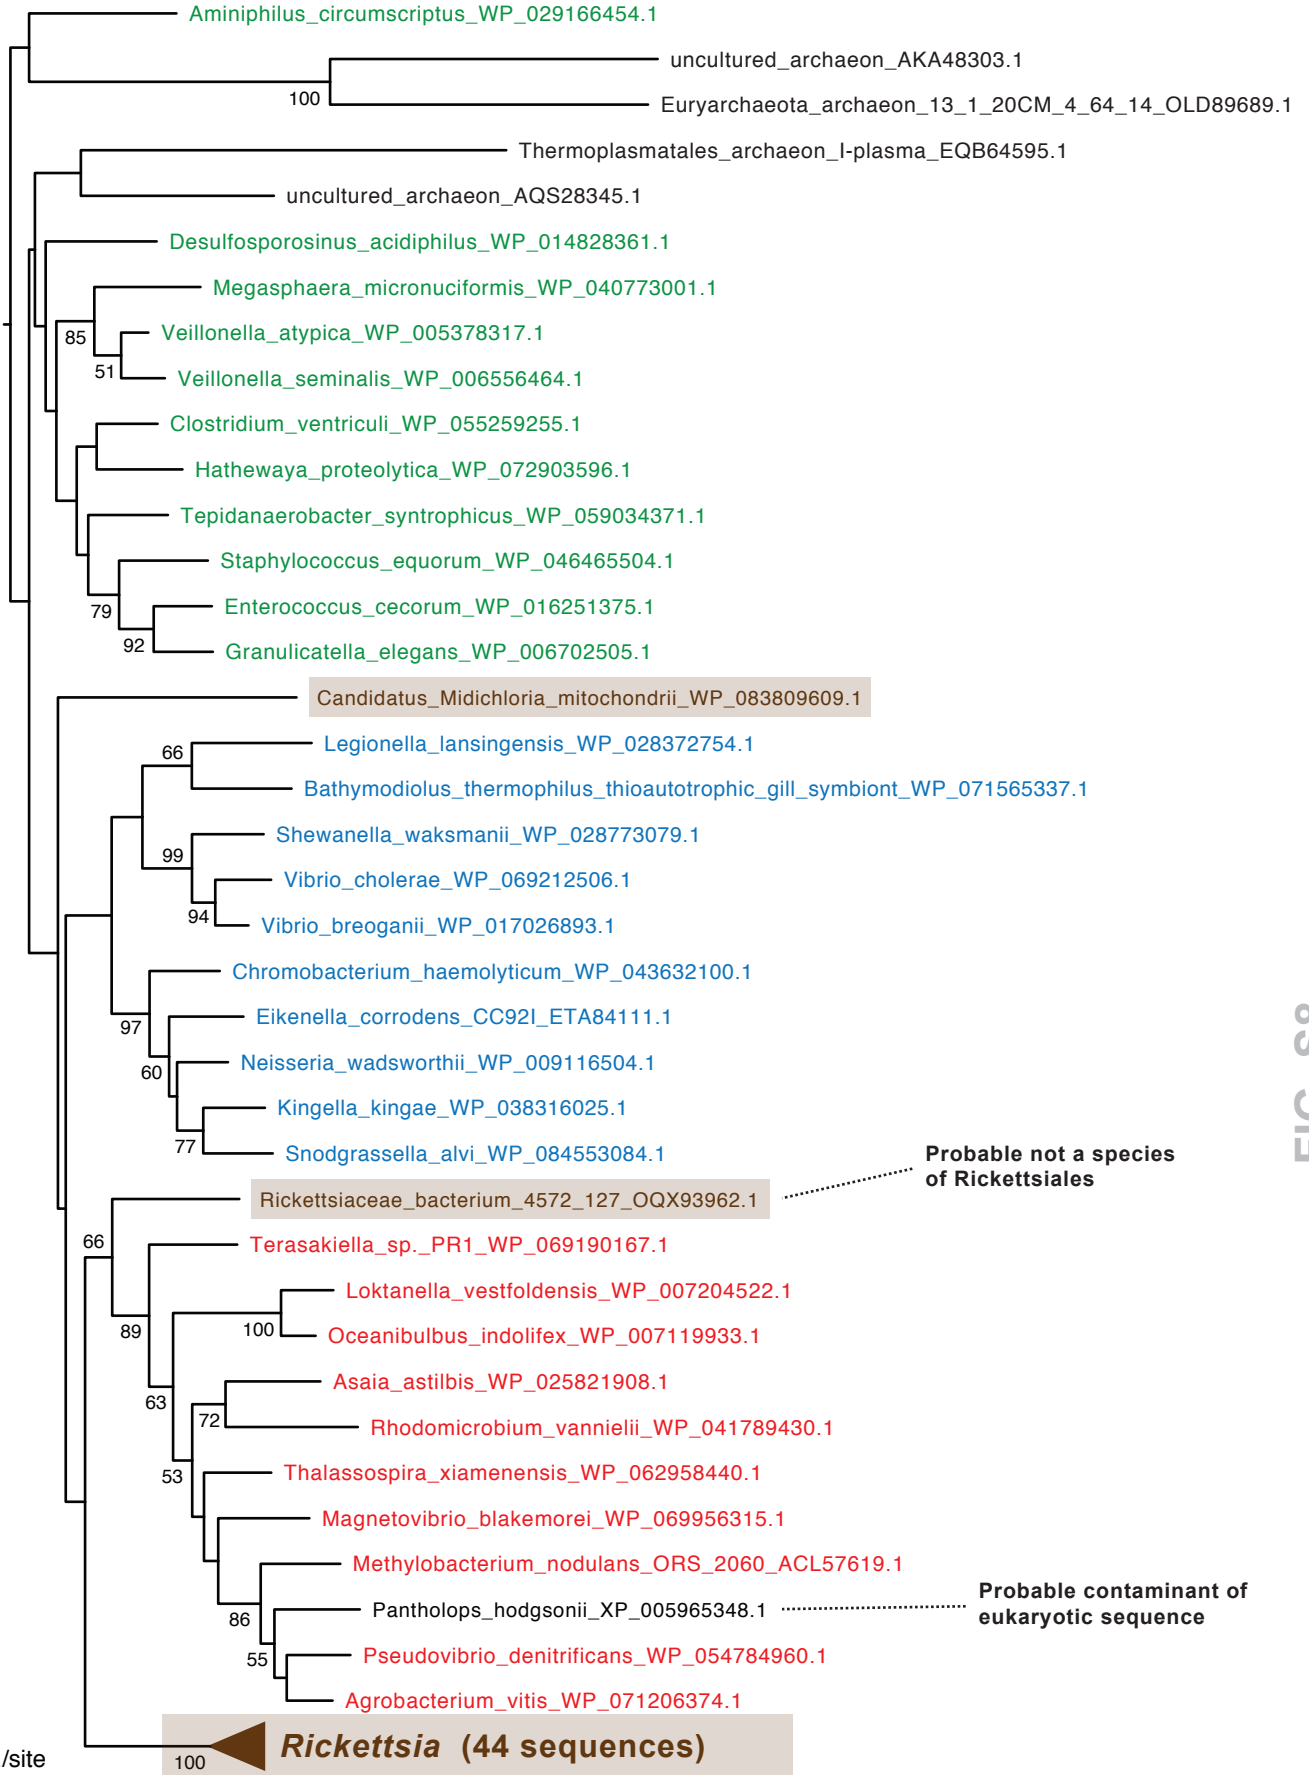
**FIG. S8**



**H**

■ Rickettsiales   
 ■ other *Alphaproteobacteria*   
 ■ other bacteria  
■ other Proteobacteria   
 ■ non-bacteria

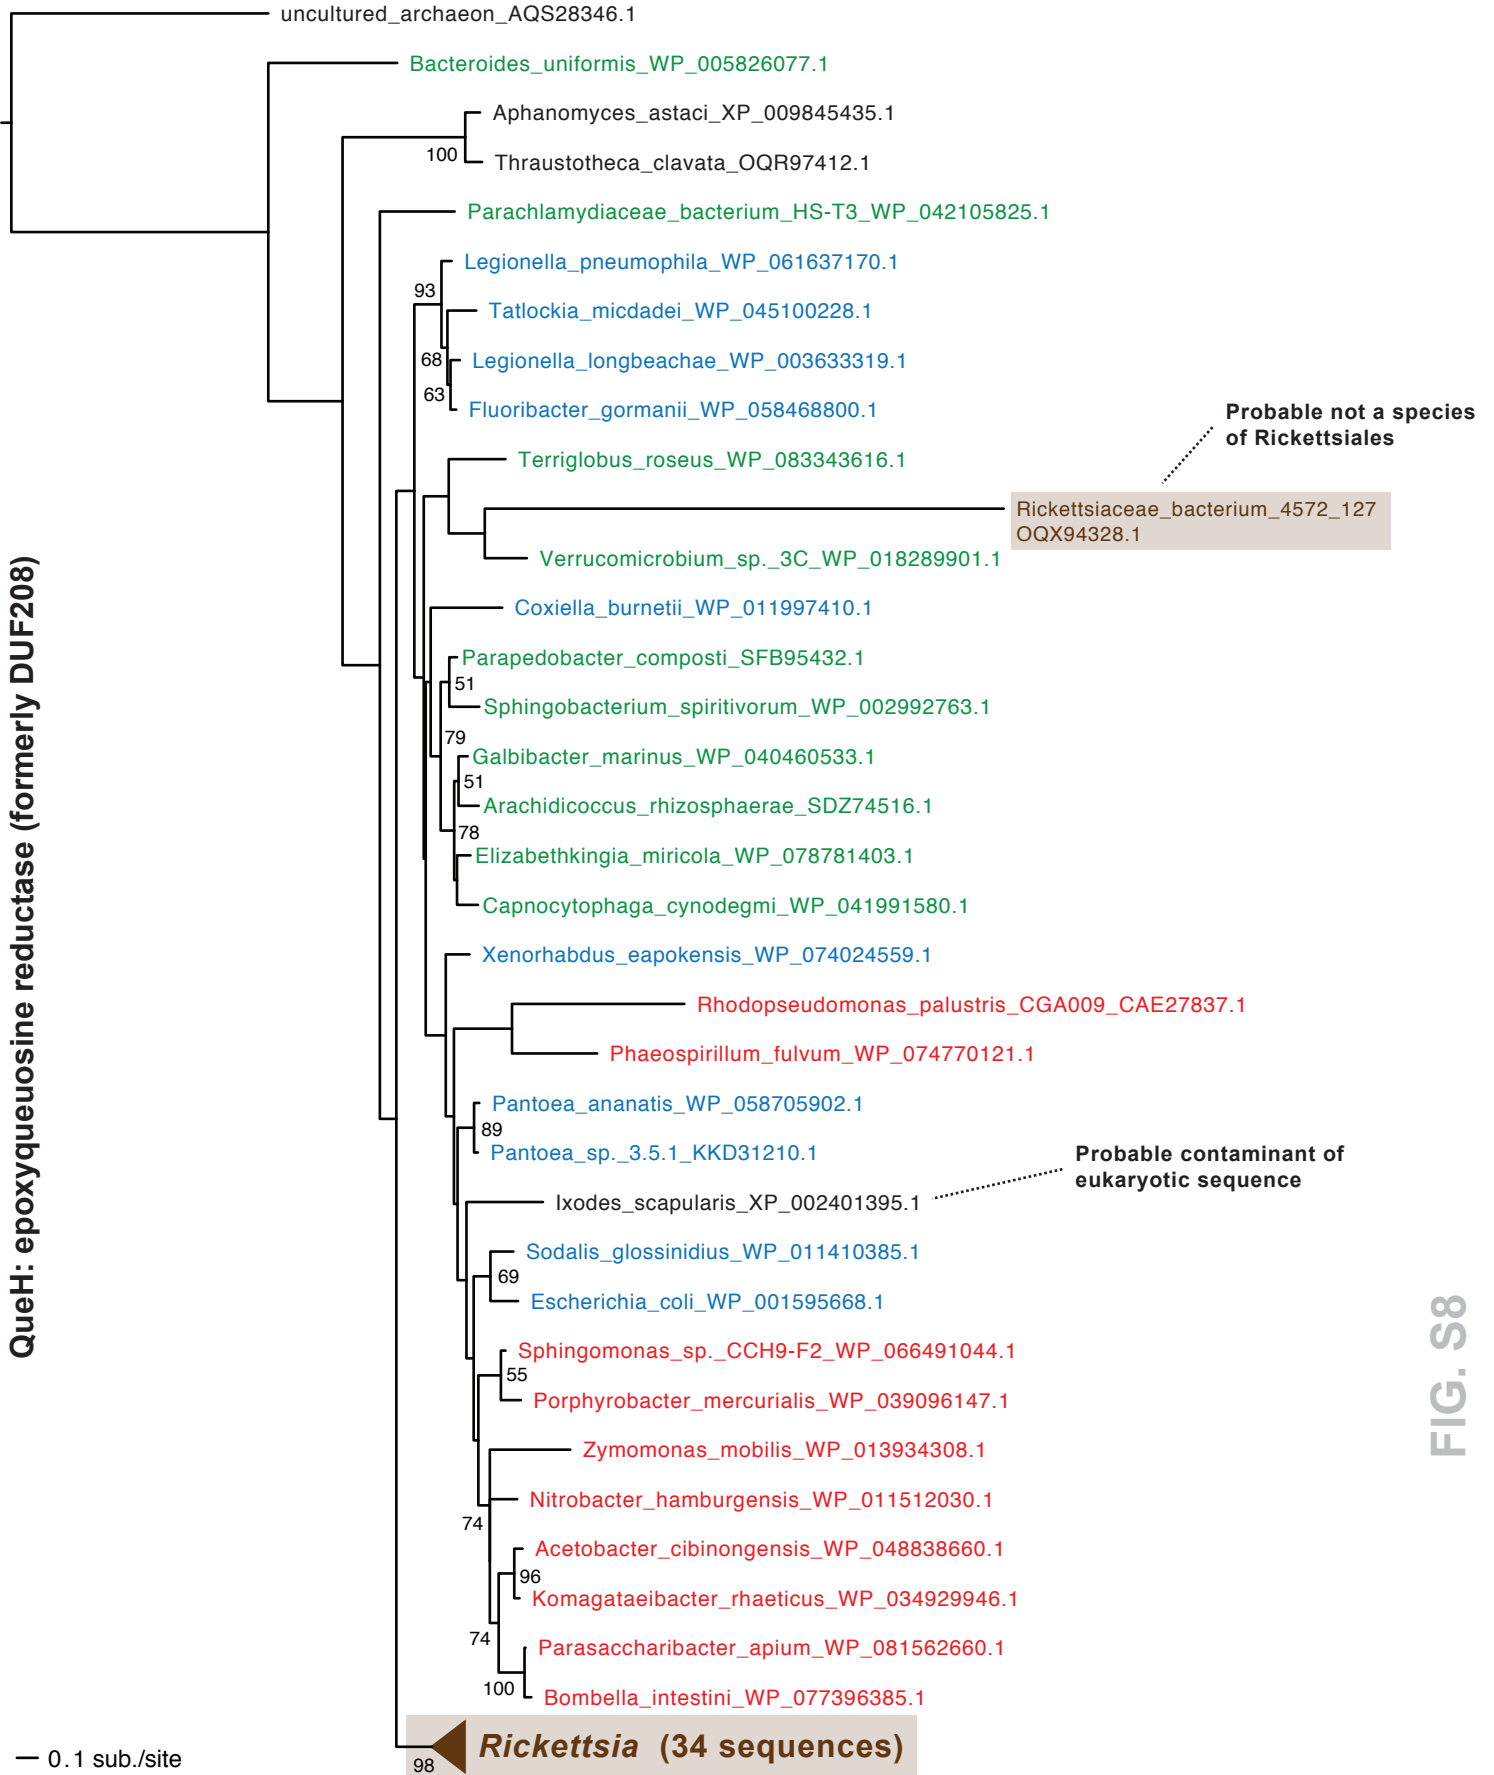**FIG. S8**
